# Supplementary material for: Direct Spinal Ventral Root Repair following Avulsion: Effectiveness of a New Heterologous Fibrin Sealant on Motoneuron Survival and Regeneration
Source: Neural Plast. 2016 Aug 24;2016:2932784. doi: 10.1155/2016/2932784 (PMC5013226; doi:10.1155/2016/2932784)
Supplement: Supplementary file 1 — Representative gait video recording obtained from the different experimental groups during CatWalk - walking track test analysis. [file 2932784.f1.zip]

Archive with 4 entries (4 files):
- Avulsion Only.avi
- Commercial Glue.avi
- Preoperative.avi
- Venom Glue.avi
